# Supplementary material for: Fabrication of robust, superhydrophobic, electrically conductive and UV-blocking fabrics via layer-by-layer assembly of carbon nanotubes
Source: Royal Society of Chemistry journal article supplement (doi:10.1039/c7ra02111a), 2017-01-01
Supplement: c7ra02111a1.pdf [file c7ra02111a1.pdf]

## **Fabrication of Robust Superhydrophobic, Electrically Conductive and UV-blocking Fabrics via Layer-by-layer Assembly of Carbon Nanotube**

Xiao-Jing Guo,<sup>a</sup> Chao-Hua Xue,<sup>\*,a,b</sup> Min Li,<sup>b</sup> Xing Li,<sup>c</sup> Jian-Zhong Ma<sup>\*,a,b</sup>

<sup>a</sup> College of Environmental Science and Engineering, Shaanxi University of Science and Technology, Xi'an 710021, China

<sup>b</sup> College of Bioresources Chemistry and Materials Engineering, Shaanxi University of Science and Technology, Xi'an 710021, China

<sup>c</sup> College of Chemistry and Chemical Engineering, Shaanxi University of Science and Technology, Xi'an 710021, China

E-mail: xuech@zju.edu.cn, majz@sust.edu.cn

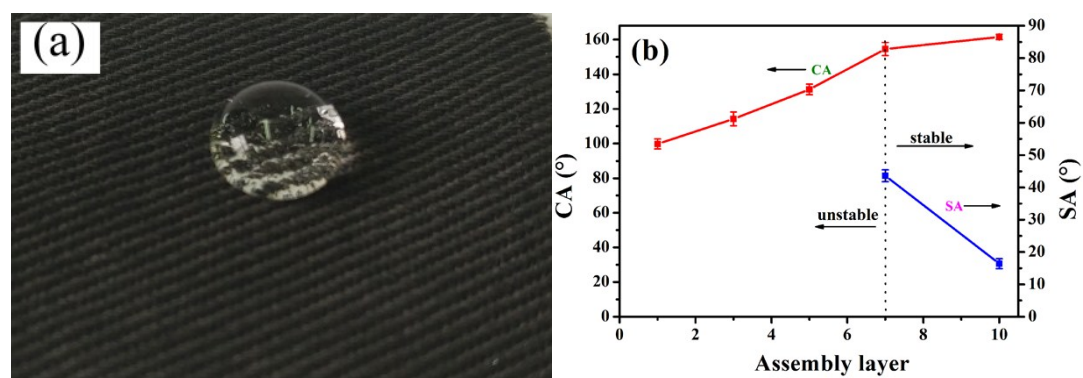

**Figure S1.** (a) Digital images of water droplets on PDMS/(CNTs/PDDA)<sub>10</sub> coated cotton fabric, (b) The relationship between the CA/SA of modified fabrics and number of assembly layers. The “unstable” in the figure (b) means that water droplets would spread out within few seconds.

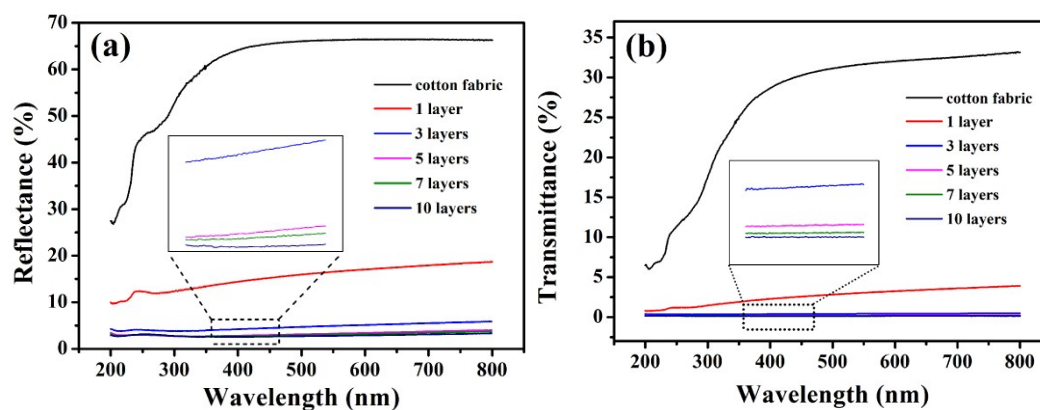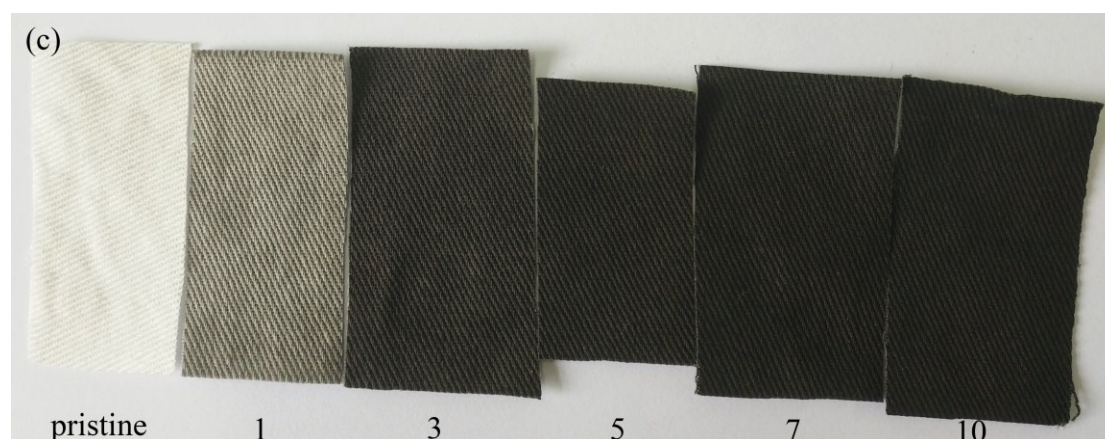

**Figure S2.** (a) UV-visible reflectance of pristine cotton, PDMS/(CNT/PDDA)<sub>n</sub> coated cotton fabrics; (b) UV-visible transmittance of pristine cotton, PDMS/(CNT/PDDA)<sub>n</sub> coated cotton fabrics. (c) Photograph of pristine cotton, PDMS/(CNT/PDDA)<sub>n</sub> coated cotton fabrics, in which the numbers mean the LBL layers

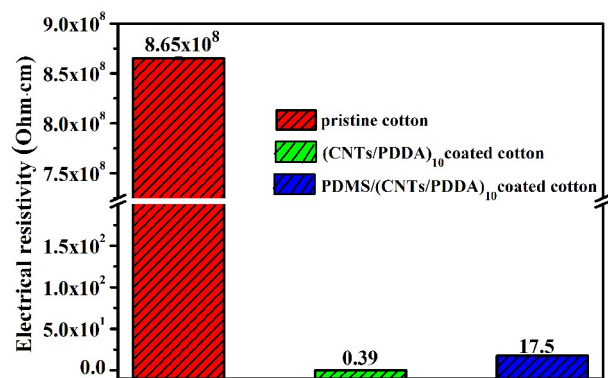

**Figure S3.** Electrical resistivity of pristine cotton, (CNTs/PDDA)<sub>10</sub> coated cotton, PDMS/(CNTs/PDDA)<sub>10</sub> coated cotton fabrics
